# Supplementary material
Source: HighWire-hosted journal article supplement (https://www.rcpjournals.org/highwire/filestream/12768/field_highwire_adjunct_files/1/S10._Heatmap_of_reported_physical_health_symptoms_in_patients_at_post-COVID_review_following_admission_for_COVID_pneumonia..pdf)
Supplement: S10._Heatmap_of_reported_physical_health_symptoms_in_patients_at_post-COVID_review_following_admission_for_COVID_pneumonia..pdf [file S10._Heatmap_of_reported_physical_health_symptoms_in_patients_at_post-COVID_review_following_admission_for_COVID_pneumonia..pdf]

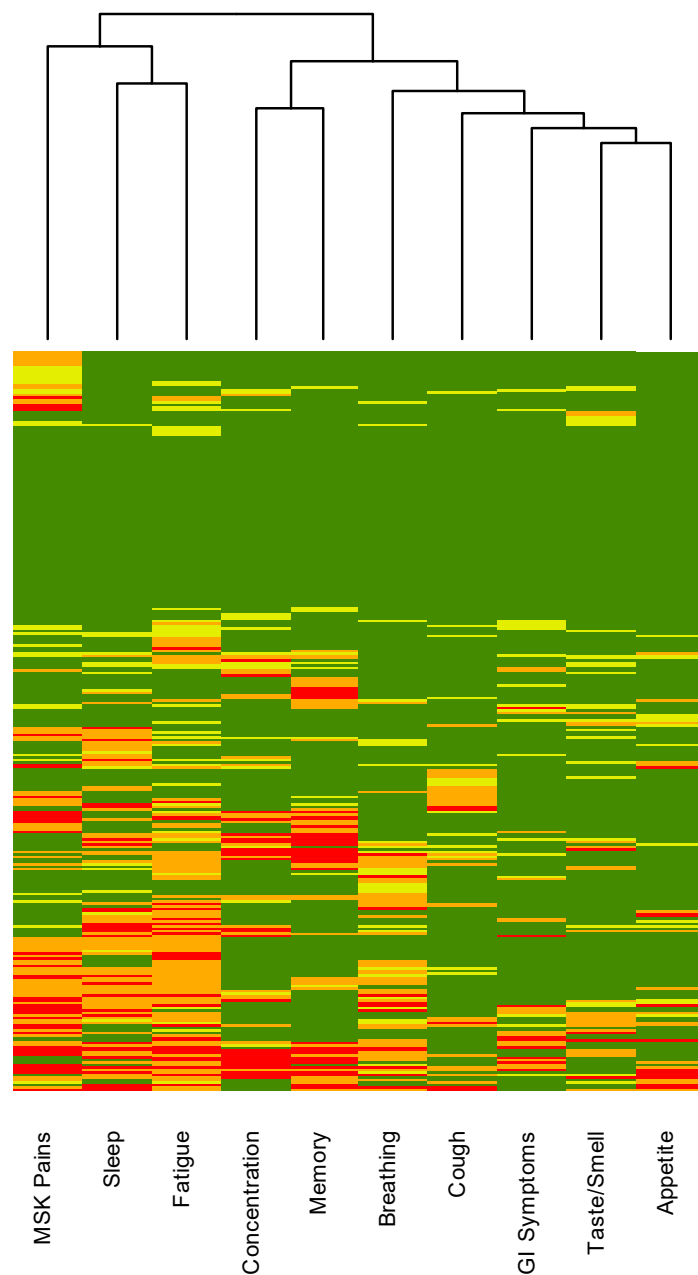

**S10. Heatmap of reported physical health symptoms in patients at post-COVID review following admission for COVID pneumonia.**

Heatmap colours: green if not reported as a current symptom; yellow if the symptom is reported but 'getting better'; orange if the symptom is 'staying the same'; red if 'getting worse'. MSK = musculoskeletal muscle or joint pains; GI = gastro-intestinal complaints of diarrhoea or abdominal pains.
